# Supplementary material
Source: PubMed Central journal article supplement (PMC2860026)

Supplementary Figure 1. Azure A metachromatic activity of CE-PAGE eluted oligosaccharide fractions.

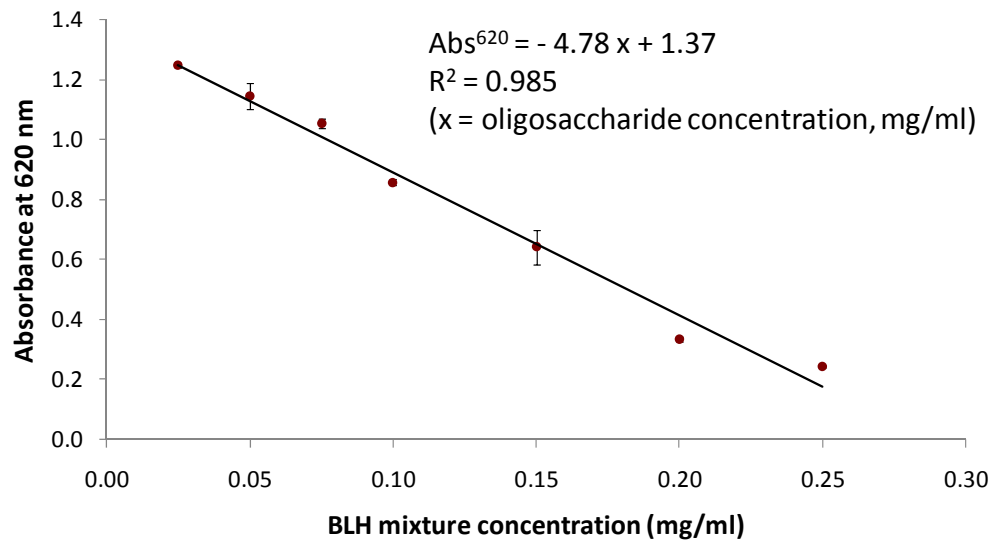

| Sample               | Concentration (mg/ml) | Absorbance at 620 nm |
|----------------------|-----------------------|----------------------|
| BLH standard 1 (n=3) | 0.025                 | 1.248 ± 0.008        |
| BLH standard 2 (n=3) | 0.050                 | 1.144 ± 0.044        |
| BLH standard 3 (n=3) | 0.075                 | 1.055 ± 0.016        |
| BLH standard 4 (n=3) | 0.100                 | 0.857 ± 0.010        |
| BLH standard 5 (n=3) | 0.150                 | 0.642 ± 0.057        |
| BLH standard 6 (n=3) | 0.200                 | 0.333 ± 0.009        |
| BLH standard 7 (n=3) | 0.250                 | 0.242 ± 0.002        |

| sample (n=3) | absorbance at 620 nm (n=3) | oligosaccharide, $\mu\text{g}$ /fraction |
|--------------|----------------------------|------------------------------------------|
| fraction 10  | 0.6086 $\pm$ 0.0047        | 38.2 $\pm$ 0.2                           |
| fraction 11  | 0.6142 $\pm$ 0.0056        | 37.9 $\pm$ 0.3                           |
| fraction 13  | 0.6991 $\pm$ 0.0106        | 33.6 $\pm$ 0.5                           |
| fraction 14  | 0.6685 $\pm$ 0.0038        | 35.2 $\pm$ 0.2                           |
| fraction 15  | 0.5952 $\pm$ 0.0038        | 38.9 $\pm$ 0.2                           |
| fraction 16  | 0.5671 $\pm$ 0.0298        | 40.3 $\pm$ 1.5                           |
| fraction 17  | 0.5364 $\pm$ 0.0100        | 41.8 $\pm$ 0.5                           |
| fraction 18  | 0.5071 $\pm$ 0.0114        | 43.3 $\pm$ 0.6                           |
| fraction 19  | 0.5586 $\pm$ 0.0077        | 40.7 $\pm$ 0.4                           |
| fraction 21  | 0.5960 $\pm$ 0.0085        | 38.8 $\pm$ 0.4                           |
| fraction 22  | 0.5759 $\pm$ 0.0087        | 39.8 $\pm$ 0.4                           |
| fraction 24  | 0.6316 $\pm$ 0.0168        | 37.0 $\pm$ 0.8                           |
| fraction 25  | 0.6838 $\pm$ 0.0154        | 34.4 $\pm$ 0.8                           |
| fraction 27  | 0.6999 $\pm$ 0.0188        | 33.6 $\pm$ 0.9                           |
| fraction 28  | 0.6828 $\pm$ 0.0175        | 34.5 $\pm$ 0.9                           |
| fraction 29  | 0.6673 $\pm$ 0.0104        | 35.2 $\pm$ 0.5                           |
| fraction 30  | 0.7312 $\pm$ 0.0147        | 32.0 $\pm$ 0.7                           |
| fraction 31  | 0.7745 $\pm$ 0.0048        | 29.9 $\pm$ 0.2                           |
| fraction 32  | 0.7616 $\pm$ 0.0091        | 30.5 $\pm$ 0.5                           |
| fraction 33  | 0.8191 $\pm$ 0.0124        | 27.6 $\pm$ 0.6                           |

fractions used for the assay

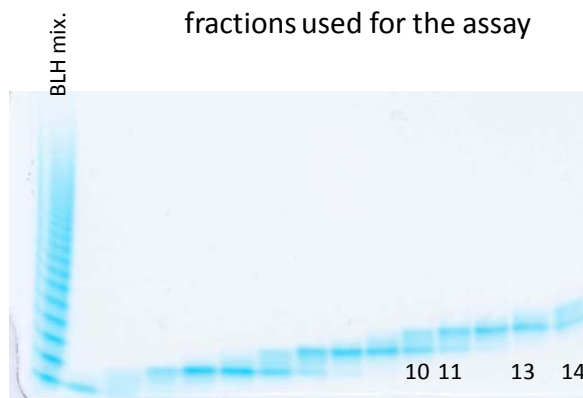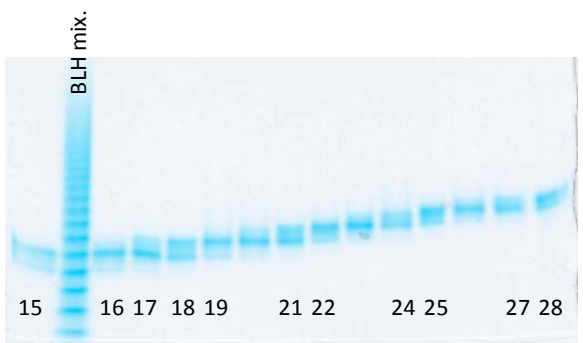

Supplement: NIHMS185955-supplement-01.pdf [file NIHMS185955-supplement-01.pdf]
