# Supplementary material
Source: PubMed Central journal article supplement (PMC2860026)

Supplementary Figure 3. A, B. SAX-HPLC analysis of CE-PAGE purified dp8. C. ESI-FTMS analysis of the gel-eluted dp8 and its two major chromatographic peaks collected during SAX-HPLC analysis: only the more abundant oligosaccharide peaks are assigned.

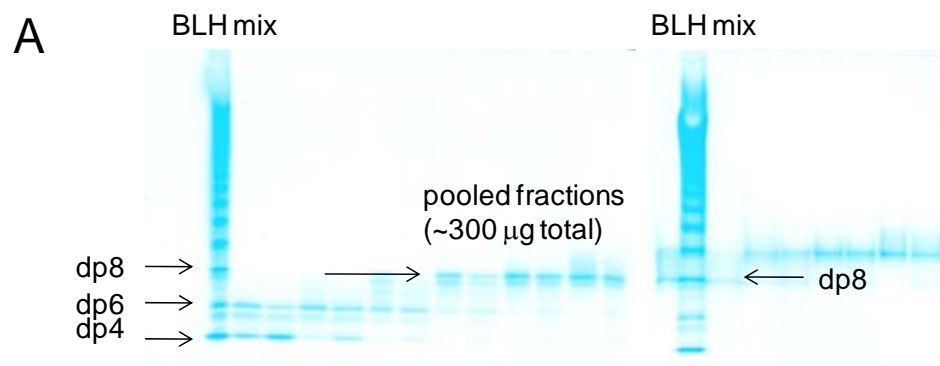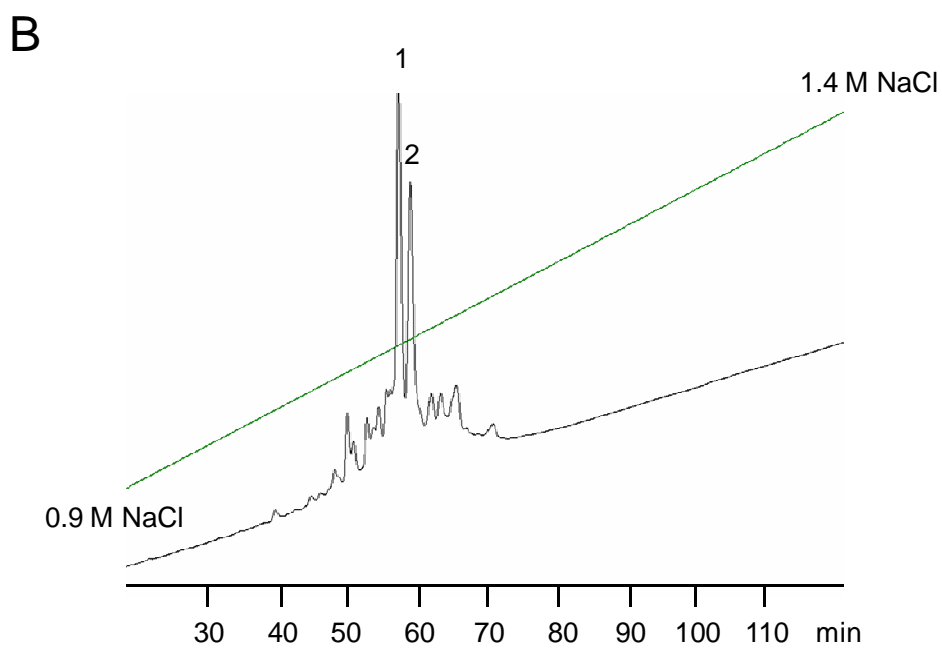

**C**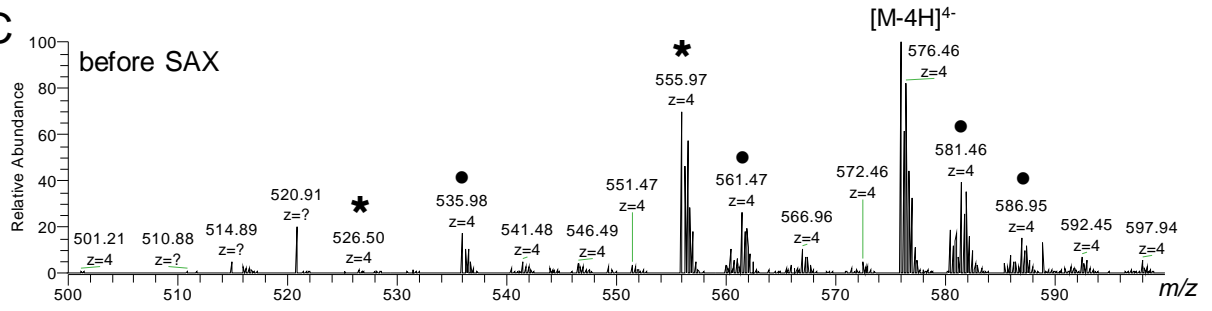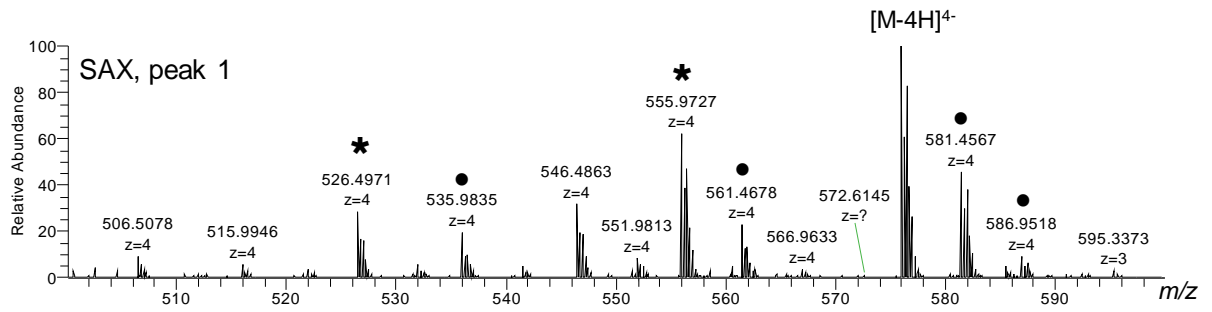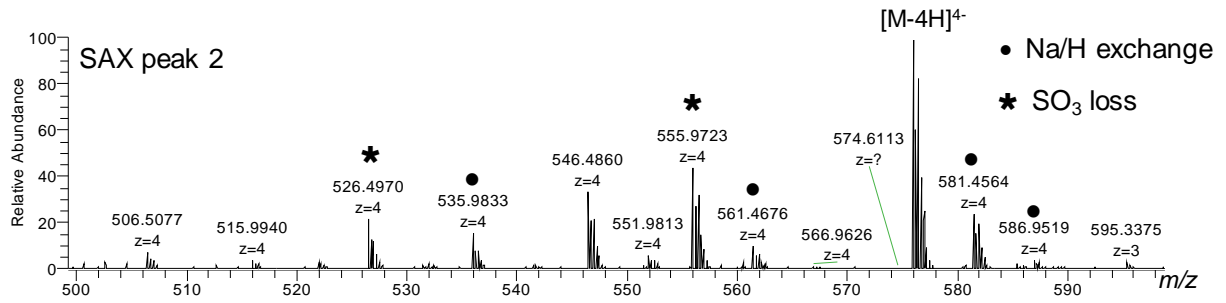

Supplement: NIHMS185955-supplement-03.pdf [file NIHMS185955-supplement-03.pdf]
