# Supplementary material
Source: PubMed Central journal article supplement (PMC2860026)

Supplementary Figure 4. A. SAX HPLC traces of the CE-PAGE eluted dp12 and dp14: peaks collected for ESI-FTMS analysis are highlighted. B. ESI-FTMS data obtained from the CE-PAGE eluted, SAX-HPLC purified dp8 – dp14.

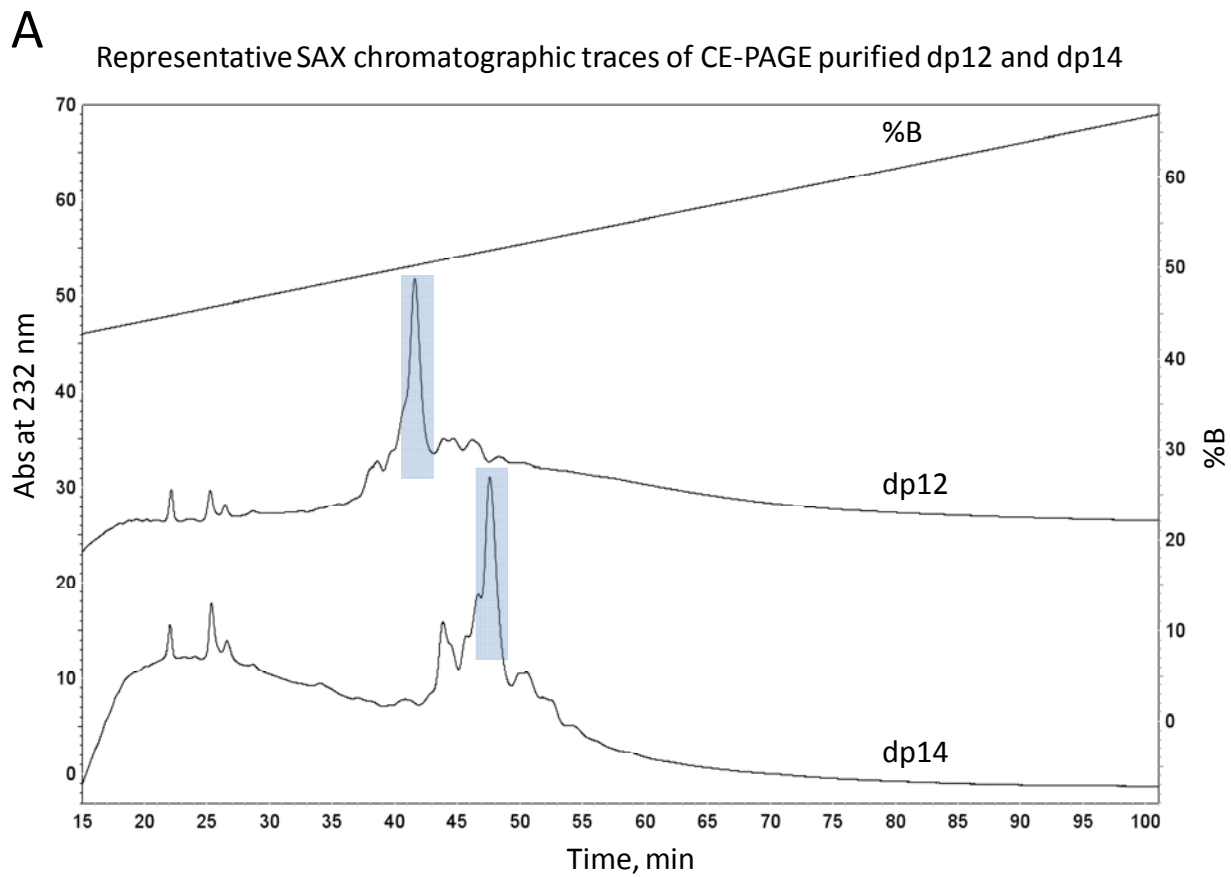

B

(-) ESI-FTMS

dp8

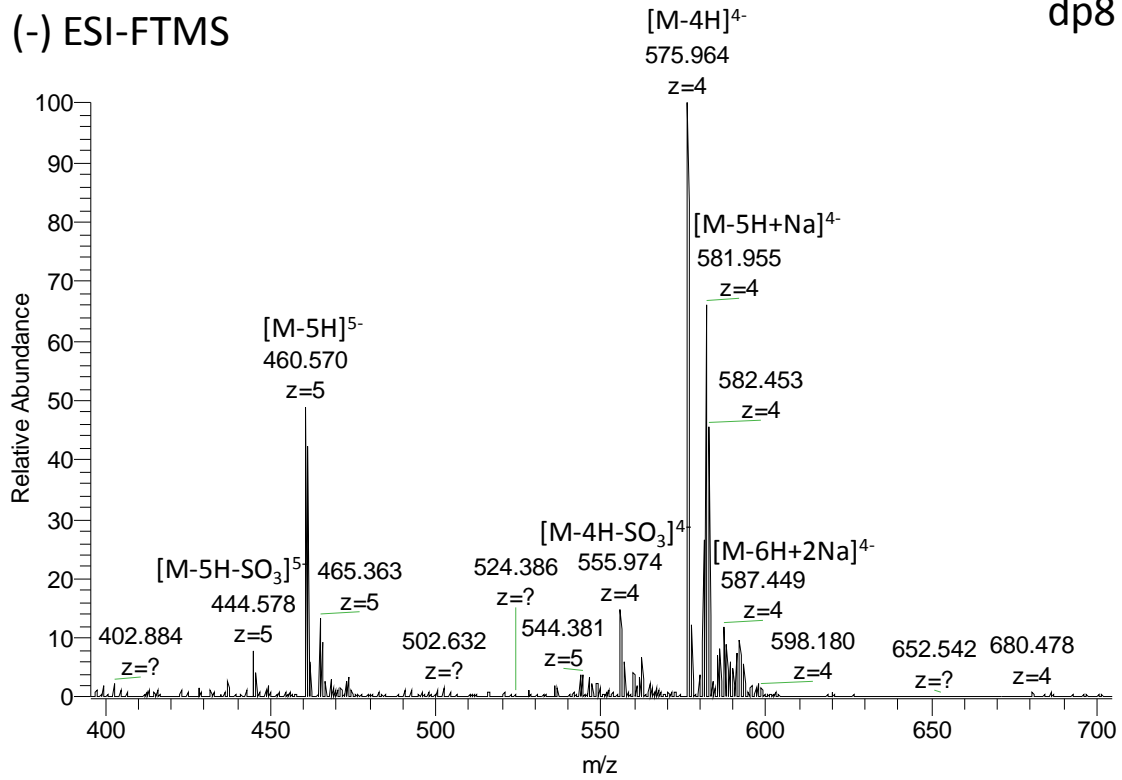

(-) ESI-FTMS

dp10

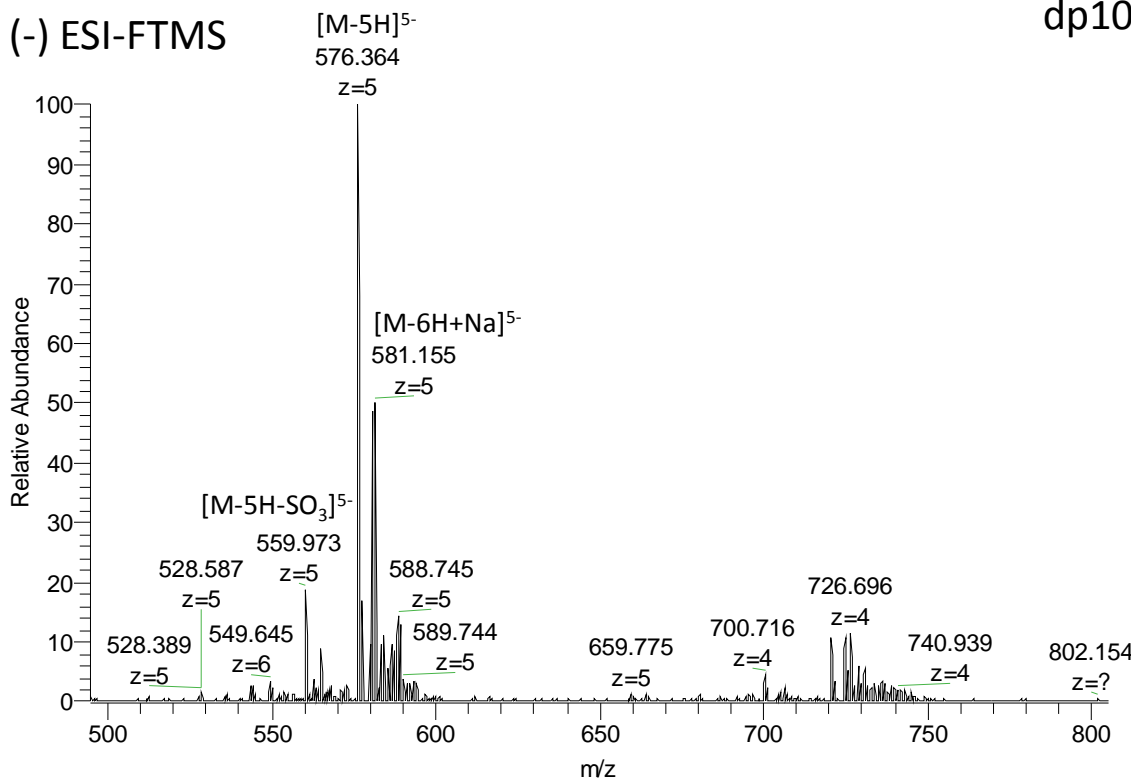

(-) ESI-FTMS

dp12

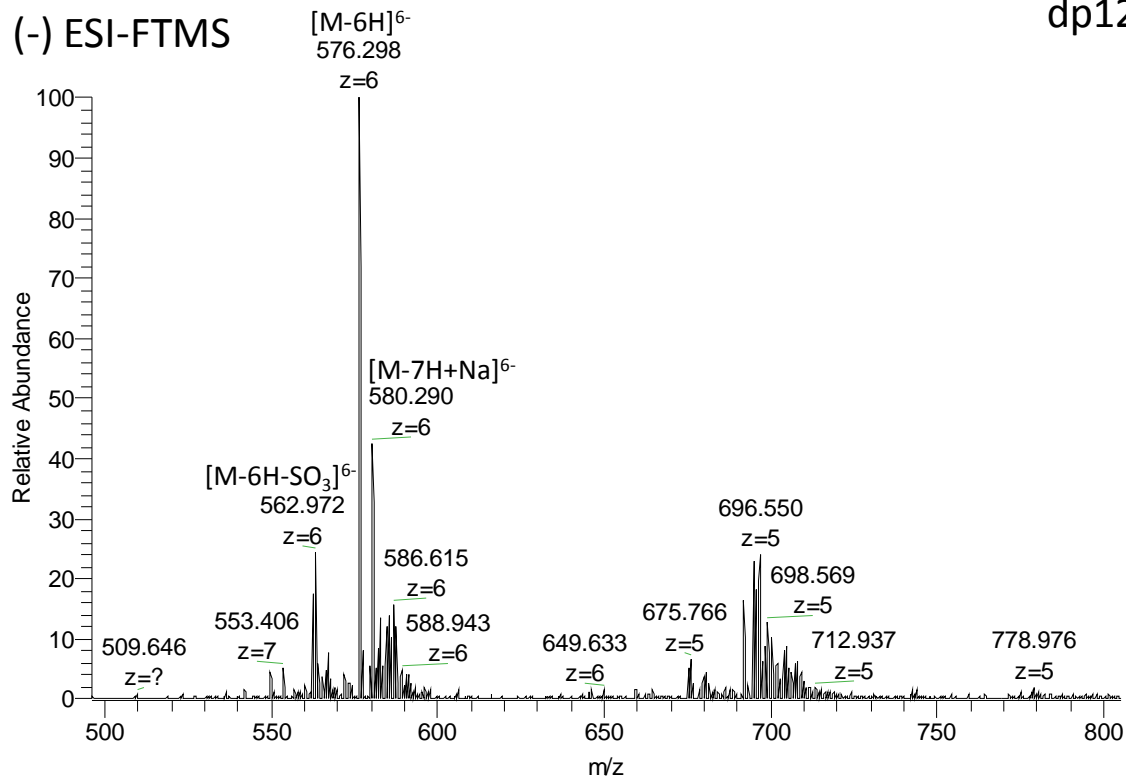

(-) ESI-FTMS

dp14

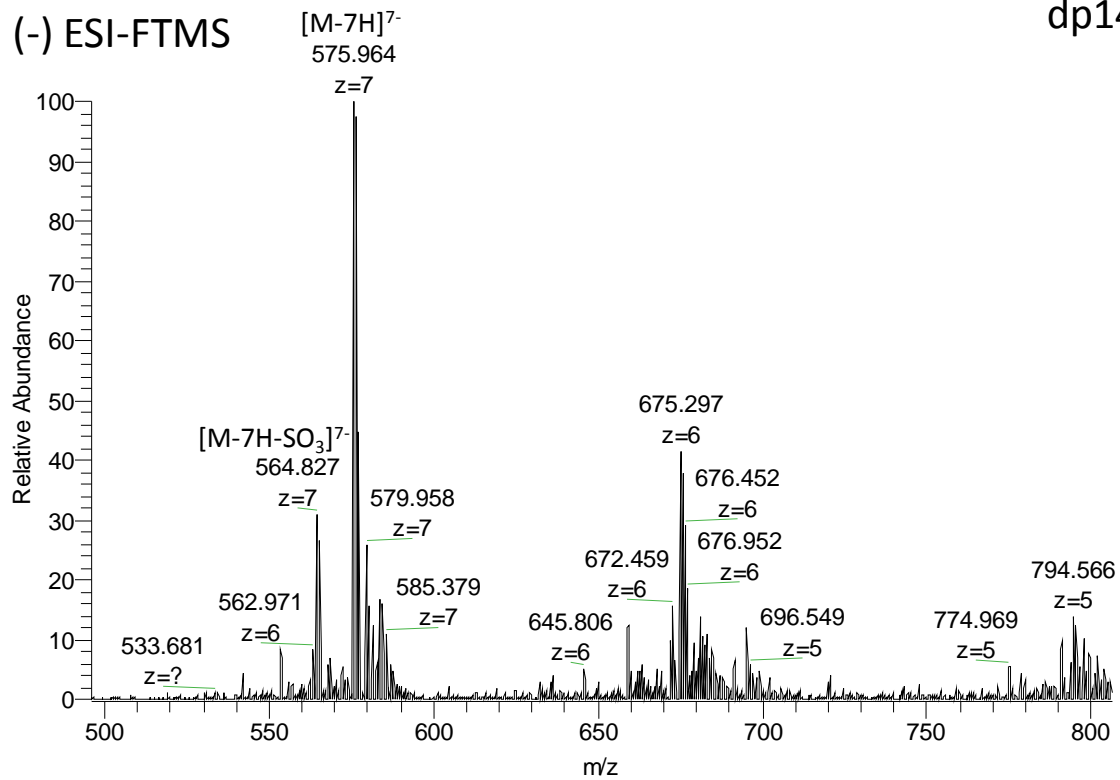

Supplement: NIHMS185955-supplement-04.pdf [file NIHMS185955-supplement-04.pdf]
