# Supplementary material
Source: PubMed Central journal article supplement (PMC2860026)

Supplementary Figure 2. 22% T PAGE analysis of CE-PAGE fractions eluted from 28-mm diameter gel.

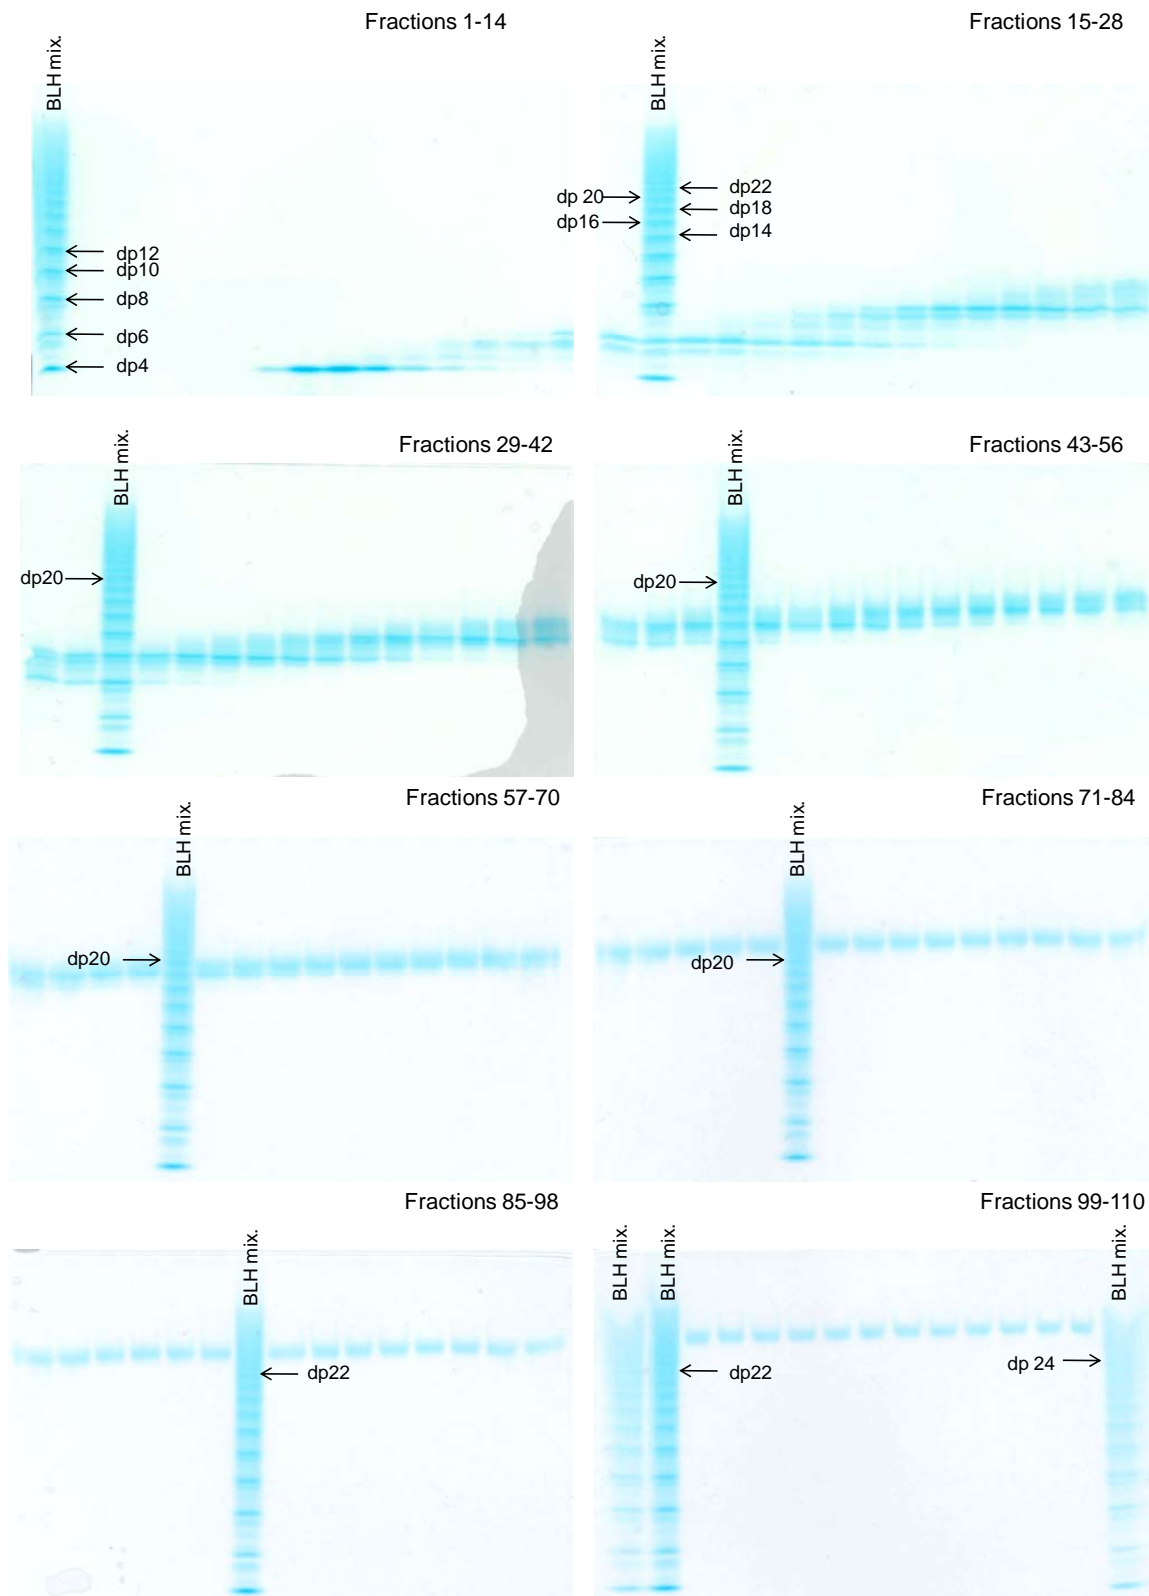

Supplement: NIHMS185955-supplement-02.pdf [file NIHMS185955-supplement-02.pdf]
